# Supplementary material for: MSH2 Loss in Primary Prostate Cancer
Source: Oxford University Press journal article supplement (doi:10.1158/1078-0432.ccr-17-0955), 2017-08-08
Supplement: 10780432ccr170955-sup-181398_3_supp_4192155_220fzy.xlsx [file 10780432ccr170955-sup-181398_3_supp_4192155_220fzy.xlsx]

## Sheet: Supp Table S1
Supplementary Table S1: Gleason score distribution for primary prostatic adenocarcinomas screened for MSH2 loss by immunohistochemistry
Gleason score	# of cases	# with MSH2 loss
5	4	0
6	144	0
3+4=7	359	2
4+3=7	285	1
4+4=8	104	1
3+5=8	21	0
5+3=8	12	0
4+5=9	108	1
5+4=9	85	7
5+5=10	6	0
unknown	5	0

## Sheet: Supp Table S2
Supplementary Table S2: Comparison of microsatellite instability (MSI( testing results by Promega PCR panel results in primary prostatic carcinomas with MSH2 loss and colorectal carcinomas that are MSI-H
	PROSTATE						Totals
ID	BAT26	NR21	BAT25	Mono27	NR24		Bimodal	8
66254	no amp	stable	shoulder	stable	bimodal		Trimodal	0
55795	no amp	shoulder	shoulder	stable	stable		Shoulder	13
34128	no amp	shoulder	stable	shoulder	stable		Average Δ =	3.625
61879	no amp	stable	shoulder	shoulder	shoulder
22966	no amp	bimodal	shoulder	shoulder	bimodal
35592	no amp	bimodal	stable	bimodal	stable
60913	no amp	stable	shoulder	stable	shoulder
3131	no amp	stable	bimodal	stable	stable
22533	bimodal	bimodal	stable	shoulder	stable	*Lynch control case
	Colorectal						Totals
ID	BAT26	NR21	BAT25	Mono27	NR24		Bimodal	34
1	biomodal	Shoulder	biomodal	biomodal	biomodal		Trimodal	10
2	biomodal	trimodal	biomodal	biomodal	biomodal		Shoulder	3
3	biomodal	biomodal	biomodal	trimodal	trimodal		Average Δ =	6.98148
4	biomodal	biomodal	biomodal	biomodal	trimodal
5	trimodal	biomodal	biomodal	biomodal	trimodal
6	biomodal	stable	stable	stable	stable
7	biomodal	biomodal	trimodal	biomodal	biomodal
8	trimodal	biomodal	biomodal	biomodal	biomodal
9	biomodal	Shoulder	biomodal	trimodal	biomodal
10	biomodal	biomodal	biomodal	trimodal	biomodal

## Sheet: Supp Table S3
Supplementary Table S3: mSINGS data for primary prostatic carcinomas with MSH2 loss
Sample ID	34128	34128	55795	55795	61879	61879	19236	19236	58319	58319	66254	66254	71503	71503	55836	55836	22533	22533	71484	71484	35554	35554	35566	35566	22966	22966	60913	60913
Sample Type	Tumor	Normal	Tumor	Normal	Tumor	Normal	Tumor	Normal	Tumor	Normal	Tumor	Normal	Tumor	Normal	Tumor	Normal	Normal	Tumor	Normal	Tumor	Normal	Tumor	Tumor 1	Tumor 2	Normal	Tumor	Normal	Tumor
unstable_loci	13	7	9	6	22	5	5	6	8	2	9	5	15	11	13	8	13	6	6	12	0	7	11	15	9	28	7	16
passing_loci	38	64	63	60	63	64	58	64	52	59	59	45	61	55	56	43	52	17	65	65	1	40	24	63	64	64	50	65
msing_score	0.3421	0.1094	0.1429	0.1	0.3492	0.0781	0.0862	0.0938	0.1538	0.0339	0.1525	0.1111	0.2459	0.2	0.2321	0.186	0.25	0.3529	0.0923	0.1846	0	0.175	0.4583	0.2381	0.1406	0.4375	0.14	0.2462
msi status	POS	NEG	NEG	NEG	POS	NEG	NEG	NEG	IND	NEG	IND	NEG	POS	NEG	POS	IND	POS	POS	NEG	IND	FAIL	IND	POS	POS	NEG	POS	NEG	POS
X:44935843-44935960		0	0	0	0	0	0	0		0	0		0						0	0				0	0	0		0
X:44920694-44920764		0	0			0		0					0						0	0				0	0	0		0
X:44918187-44918257		0	0	0	1	0	1	0	0	0	0		0	1	0	1	1		0	0		0		0	0	0	0	0
X:39930399-39930469		0	0		0	0		0											0	0				0				0
22:30051671-30051741		0	0	0	0	0	0	0	0	0	0	0	0	1	1	0	0		0	1				0	1	1		1
22:24135934-24136004		1	0	1	1	0	0	0		0	0	0	1	1	0		0		0	1				1	0	0		0
22:23633360-23633430	1	0	0	1	1	0	0	0	0	0	0	0	0	0	0	0	0	1	1	0		1	0	0	0	1	1	0
22:23631778-23631848	0	0	0	0	0	0	0	0	0	0	0	0	0	0	0	0	1		0	0		0		0	0	0	0	0
22:23618560-23618630		0	0	0	0	0	0	0	0	0	0	0	0	0	0	0	1		0	1			1	0	0	1	0	0
19:40736588-40736659	0	0	0	0	0	0	0	0	1	0	1	0	1	0	1	0	1		0	0		0	1	1	0	0	0	1
18:48584820-48584891	1	0	1	0	0	0	0	0	0	0	0	0	0	0	0	0	0		0	0				0	0	0	1	0
17:38494924-38494994		0	0	0	0	0	0	0		0		0			0	0	1	0	0	0		1	0	0	1	0	1	0
17:30293115-30293185	1	0	0	0	1	0	0	0	1	0	1	1	1	0	0	1	1		0	0		0	1	1	0	1	0	1
17:29559027-29559097		0	0	0	0	0	0	0	0	0	0		0	0	0		0		0	0		0		0	0	0	0	0
17:29508785-29508855	0	0	0	0	0	0	0	0	0	0	0	1	0	0	1	1	0		0	0		0		0	0	1	0	0
17:7577644-7577714		1	1	0	0	0	0	1		0	0	1	1		1	1			1	0			1	1	1	1	0	1
17:7576408-7576479		0			0	0		0			0								0	0				1	1	1		0
16:9934636-9934706		0	0	0	0	0	0	0	0	0	0		0	0	0				0	0				0	0	0		0
16:3808018-3808088		0	1	0	1	1	0	0	1	0	1	0	1	0	0	0			0	0				0	0	1		0
15:99192720-99192790		0	0	0	0	0	0	0					0				0		0	0				0	0	0	0	0
15:74320749-74320819	1	0	0	0	0	0	0	0	0	0	0	0	0	0	0	0	0	1	0	0		0	1	0	0	0	0	0
13:49039060-49039130																			0	0					1	0		0
13:28942806-28942876	0	0	0	0	1	0	0	0	0	0	0	0	1	0	0	0	0		0	0		0	0	1	0	0	0	0
12:112893641-112893711		0	0		0	1		1					0						0	1				0	1	1		0
12:58141970-58142040	1	1	1	0	1	0	0	0	1	1	1	0	0	0	0	0	0	1	0	1		0		0	0	1	0	1
11:119144757-119144827	0	0	0	0	0	0	0	0	0	0	0	0	0	0	0	0	0		0	0		0		0	0	1	0	0
11:118369231-118369301	0	0	0	0	0	0	0	0	0	0	0	0	0	0	0		0		0	0		0		0	0	0	0	1
11:118359912-118359982		0	0	0	0	0	0	0	0	0	0	0	0		1		1		0	0			0	0	0	0	0	0
11:118353003-118353073	1	0	0	0	0	0	0	0	0	0	1	0	0	0	0	0	0		0	0		0		0	0	0	0	0
11:108141921-108141991	0	1	0	0	0	0	0	0	0	0	0	0	0	0	0	0	0		0	0		0	1	0	0	0	0	0
11:108121376-108121446		0	0	0	1	0	0	0	0	0	0		0	1	1		0		0	1				0	0	1		1
11:108114627-108114697	0	0	0	0	1	0	0	0	0	0	0	0	1	0	0	1	0		0	0		0		0	0	0	0	0
11:108100070-108100141		0	0	0	0	0	0	0	0	0	0	0	0	0	0	0	0		0	0		0		0	0	0	0	0
10:89720599-89720669		0	0	0	1	0	0	0	0	0	0		0	1	1		0	0	0	0				0	0	1	0	0
10:32316507-32316577	1	0	0	0	1	0	1	0	1	0	0	0	0	1	1	0	1	1	1	0		0	1	1	0	1	0	1
10:32309275-32309345	0	0	0	0	1	0	0	0	0	0	0	0	0	0	0	0	1	0	0	0		0		0	0	0	0	0
9:135772966-135773036		0	0	0	1	0		0		0	0	0	0	1			0		0	0		0		0	0	0		0
9:80343553-80343623	0	0	1	0	1	0	0	0	0	0	0	0	1	0	0	0	0		0	0				0	0	1	0	1
7:116409641-116409711	0	0	0	0	0	0	0	0	0	0	0		0	0	0		0		0	0		0		0	0	0	0	0
7:6037023-6037093	1	0	0	0	0	0	0	0	0	0	0	0	1	0	0	0	0	0	0	1				1	1	1	0	1
6:117653295-117653365		0	0	0	0	0	0	0	0	0	0		0	0					0	0		0	0	0	0	1	0	0
6:117642958-117643028	1	0	0	1	0	0	0	0	0	0	0		0	0	0	0	0		0	0		0	0	0	0	0	0	0
5:67594365-67594435	1	1	1	1	1	1	1	1	1	0	1	1	1	1	1	1	1	1	1	1		1	0	1	1	1	1	1
5:67576296-67576366	1	1	0	0	1	1	0	0	1	0	0	0	0	0	1		1		0	0				1	0	0	0	0
5:38966869-38966939		0	0	0	0	0	0	0	0	0	0		0	0	0				0	0				0	0	1		0
4:153268193-153268263	0	0	0	1	0	0	0	0	0	0	0	0	1	0	1	0	0		0	0				0	0	0	0	1
4:55976912-55976982		0	0	0	0	0	0	0	0	0	0		0	0	0	0	0		0	0		0	0	0	0	0	0	0
4:55598177-55598247	0	0	0	0	0	0	0	0	0	0	0	0	0	0	0	0	1	0	0	0		0	0	0	0	0	0	0
4:55130967-55131037		0	0	0	0	0	0	0	0	0	0		0	0	0				0	0				0	0	1	1	0
3:52621552-52621622		0	0	0	1	0		1		1	0		1	0	1				1	1				1	0	1		1
2:212578345-212578415	0	0	0	0	1	0	0	0	0	0	0		1	0	0	1	0		0	0		0		0	0	1	0	0
2:111886146-111886216	1	0	1	0	1	1	0	0	0	0	1	0	0	0	0	0	0		0	0		0	0	1	0	1	1	0
2:111884962-111885032	0	0	0	0	0	0	0	0	0	0	0	0	0	0	0	0	0		0	0				0	0	0	0	0
2:48033856-48033926	0	0	0	0	0	0	0	0	0	0	0	0	0	0	0	0	0		0	1		1		0	0	0	0	0
2:48032706-48032776	0	0	0	0	0	0	0	1	0	0	1	1	0	1	0	0	0	0	0	0		0		1	0	1	0	1
2:47641524-47641595		0	0	0	0	0	0	0		0	0	0	0	0	0		0		0	0		0			0	0		0
2:42529642-42529712	0	0	0	0	0	0	0	0	0	0	0	0	0	0	0	0	0	0	0	0	0	1	0	0	0	0	0	0
2:42506567-42506637	0	0	0	0	0	0	0	0	0	0	0	0	1	0	0	0	0	0	0	0		0	0	0	0	0	0	0
2:42504676-42504746	0	0	0	0	1	0	0	0	0	0	0	0	0	0	0	0	0		0	0		1	1	0	0	1	0	0
2:42499183-42499253	0	0	0	0	0	0	0	0	0	0	0	0	0	0	0	0	0	0	0	0		0	1	0	0	0	0	0
2:42493756-42493826	0	0	1	0	0	0	0	0	0	0	0	0	0	0	0	0	1	1	0	1		0	1	0	0	1	0	0
2:42481723-42481793	0	0	0	0	1	0	0	0	0	0	0	0	0	0	0	0	0		0	0		0	1	1	0	0	0	0
2:42476398-42476468	0	0	0	0	0	0	0	0	0	0	0	0	0	0	0	0	0	0	0	0		0	0	0	0	0	0	0
1:243736176-243736246	0	0	0	0	0	0	1	0	1	0	0	0	0	1	0	0	0	0	0	0		1		0	0	1	0	1
1:204494722-204494792	1	1	1	1	1	0	1	1	0	0	1	0	1	1	1	1	0		1	1		0		1	1	1	1	1

## Sheet: Supp Table S4
Supplementary Table S4: T-cell receptor sequencing results for primary prostatic adenocarcinoma samples with and without MSH2 loss by immunohistochemistry
sample_name	MSH2 loss case?	total_templates	productive_templates	fraction_productive	total_rearrangements	productive_rearrangements	productive_clonality	max_productive_frequency	locus	Total Mutation Burden (coding only out of 1.33Mb)	Mutations/Mb Coding	CD8/mm2	PD-L1 +
66254	case	3297	2736	0.8298	2216	1780	0.0783	4.09357	TCRB	45	34	534.883	yes
71503	case	7878	6261	0.7947	5833	4635	0.0428	1.29372	TCRB	138	104	1016.33	yes
61879	case	20597	17423	0.8459	10889	8894	0.1166	4.67772	TCRB	101	76	523.045	yes
71488	control	2693	2188	0.8125	2183	1768	0.0452	3.70201	TCRB	NA	NA	97.4136	NA
72898	control	8960	7260	0.8103	6019	4775	0.0697	3.34711	TCRB	NA	NA	119.016	NA
46818	control	2233	1759	0.7877	2056	1609	0.0107	1.08016	TCRB	NA	NA	59.6825	NA
	cases (average)	10590.7	8806.67	0.823467	6312.67	5103	0.0792333	3.355
	controls (average)	4628.67	3735.67	0.8035	3419.33	2717.33	0.0418667	2.70976
